# Supplementary material for: Evaluation of the Predictive Role of Blood-Based Biomarkers in the Context of Suspicious Prostate MRI in Patients Undergoing Prostate Biopsy
Source: MDPI journal article supplement (doi:10.3390/jpm11111231), 2021-11-19
Supplement: s1 [file s1]

## Supplementary Materials

**Supplementary Table S1.** Biomarker cut-offs with diagnostic estimates for GG  $\geq 2$  prediction.

|                | Cut-off      | Sens (%) | Spec (%) | NPV (%) | PPV (%) |
|----------------|--------------|----------|----------|---------|---------|
| NLR            | $\geq 2.75$  | 35       | 82       | 48      | 72      |
| dNLR           | $\geq 2.06$  | 28       | 91       | 38      | 80      |
| PLR            | $\geq 133.5$ | 44       | 64       | 46      | 63      |
| LMR            | $< 2.07$     | 17       | 93       | 45      | 78      |
| SII            | $\geq 272.6$ | 28       | 81       | 45      | 67      |
| PNI            | $< 52.8$     | 48       | 79       | 52      | 76      |
| De Ritis ratio | $\geq 1.11$  | 35       | 78       | 47      | 68      |

Abbreviations: dNLR: derived neutrophil-lymphocyte ratio; LMR: lymphocyte-monocyte ratio; NLR: neutrophil-lymphocyte ratio; NPV, negative predictive value; PLR, platelet-lymphocyte ratio; PNI: prognostic nutrition index; PPV, positive predictive value; Sens, sensitivity; Spec, specificity.

**Supplementary Table S2.** Univariable analyses for GG  $\geq 2$  and any PCa detection in patients with PI-RADS  $\geq 3$  undergoing MRI targeted and systematic biopsy.

| Variable                      | Univariable Analysis for GG $\geq 2$ Detection |            |                 | Univariable Analysis for PCA Detection |            |                 |
|-------------------------------|------------------------------------------------|------------|-----------------|----------------------------------------|------------|-----------------|
|                               | OR                                             | 95% CI     | <i>p</i> -value | OR                                     | 95% CI     | <i>p</i> -value |
| Age (per 1 year)              | 1.07                                           | 1.04–1.10  | $< 0.001$       | 1.08                                   | 1.05–1.11  | $< 0.001$       |
| PSA (per 1 unit)              | 1.05                                           | 1.01–1.08  | 0.009           | 1.04                                   | 1.00–1.07  | 0.037           |
| PSAD (per 0.1 unit)           | 1.80                                           | 1.45–2.22  | $< 0.001$       | 1.81                                   | 1.42–2.30  | $< 0.001$       |
| DRE (cT $\geq 2$ )            | 4.87                                           | 2.64–8.98  | $< 0.001$       | 4.69                                   | 2.31–9.54  | $< 0.001$       |
| PI-RADS 3                     | Ref.                                           | Ref.       |                 | Ref.                                   | Ref.       |                 |
| PI-RADS 4                     | 7.04                                           | 2.62–18.95 | $< 0.001$       | 5.46                                   | 2.42–12.32 | $< 0.001$       |
| PI-RADS 5                     | 24.06                                          | 8.50–68.12 | $< 0.001$       | 25.37                                  | 9.85–65.36 | $< 0.001$       |
| NLR (high vs. low)            | 2.39                                           | 1.41–4.05  | 0.001           | 2.45                                   | 1.36–4.42  | 0.003           |
| dNLR (high vs. low)           | 3.67                                           | 1.91–7.07  | $< 0.001$       | 4.06                                   | 1.86–8.87  | $< 0.001$       |
| PLR (high vs. low)            | 1.42                                           | 0.88–2.29  | 0.154           | 1.57                                   | 0.93–2.66  | 0.09            |
| LMR (high vs. low)            | 0.35                                           | 0.16–0.75  | 0.007           | 0.21                                   | 0.07–0.60  | 0.004           |
| SII (high vs. low)            | 1.69                                           | 0.99–2.87  | 0.055           | 1.61                                   | 0.90–2.87  | 0.109           |
| De Ritis ratio (high vs. low) | 1.62                                           | 0.99–2.63  | 0.053           | 1.70                                   | 1.00–2.88  | 0.051           |
| mGPS (per 1 unit)             | 0.94                                           | 0.48–1.87  | 0.868           | 1.37                                   | 0.63–3.00  | 0.43            |
| PNI (high vs. low)            | 0.39                                           | 0.24–0.65  | $< 0.001$       | 0.32                                   | 0.18–0.56  | $< 0.001$       |

Abbreviations: dNLR: derived neutrophil-lymphocyte ratio; DRE: digital rectal examination; GG: Gleason Grade; LMR: lymphocyte-monocyte ratio; *n*: number; mGPS: modified Glasgow prognostic score; NLR: neutrophil-lymphocyte ratio; PCA: prostate cancer; PI-RADS: Prostate Imaging-Reporting and Data System; PLR, platelet-lymphocyte ratio; PNI: prognostic nutrition index; PSA: prostate-specific antigen; PSAD: PSA density; SII: systemic immune-inflammation index.

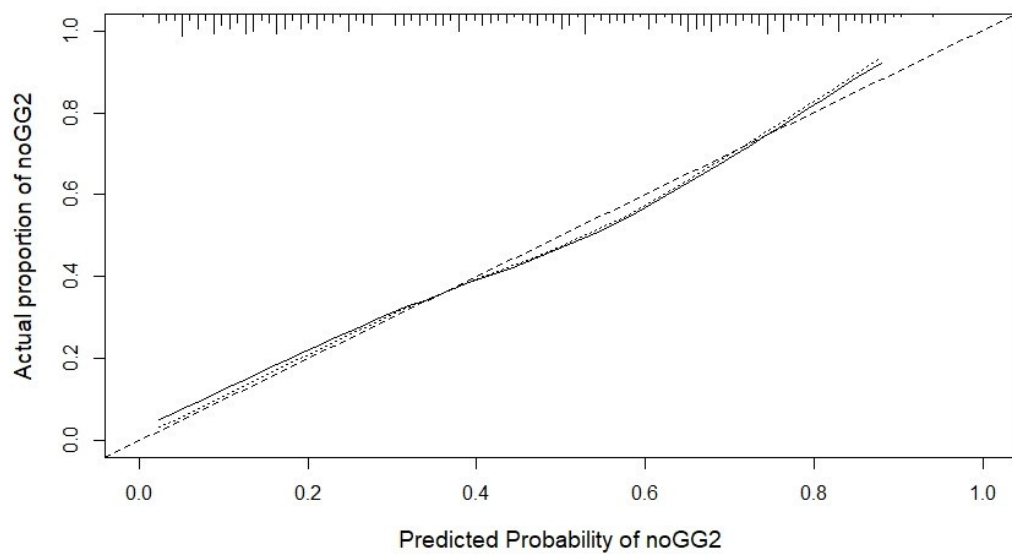

**Supplementary Figure S1.** Calibration plots of the pre-biopsy nomogram based on clinical variables and dNLR predicting absence of  $GG \geq 2$ .

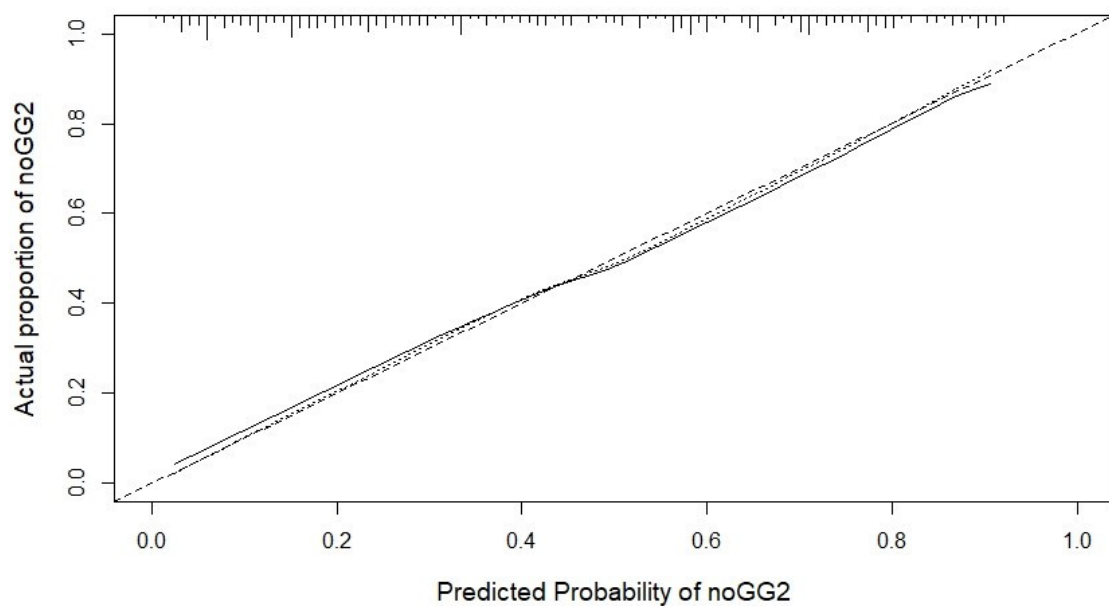

**Supplementary Figure S2.** Calibration plots of the pre-biopsy nomogram based on clinical variables and PNI predicting absence of  $GG \geq 2$ .
